# Supplementary material for: Suffering in Silence: Psychological and Social Experiences of Survivors of Child Marriage in the North East Region of Ghana
Source: Research Square preprint supplement (doi:10.21203/rs.3.rs-7764375/v1), 2025-10-29
Supplement: Supplementary file 1 [file ee195e823493b262572d29b8.pdf]

**UNIVERSITY OF EDUCATION, WINNEBA**  
**FACULTY OF APPLIED BEHAVIOURAL SCIENCES IN EDUCATION**  
**DEPARTMENT OF COUNSELLING PSYCHOLOGY**  
**INTERVIEW GUIDE FOR CHILD MARRIAGE SURVIVOURS**  
**SECTION A: DEMOGRAPHIC DATA**

1. How old are you?
2. How old were you when you got marriage?
3. What level of education did you attain before you got marriage?
4. What work are you currently doing?

**SECTION B: PSYCHOLOGICAL EXPERIENCES**

**A. Depression**

1. Can you share your emotional experiences before, during, and after marriage?
2. Have you ever experienced sadness, hopelessness, or a lack of interest in once-enjoyed activities?
3. How frequently do you feel worn out or unmotivated to accomplish tasks?
4. Which memories or circumstances make you feel depressed?

**B. Anxiety**

1. Since your marriage, are there any situations that cause you to feel anxious, tense, or afraid?
2. Do you frequently find yourself tense or worried about potential future events?
3. When circumstances evoke memories of your previous marriage, how do you typically respond?

**C. Low-Self Esteem**

1. What would you say about your self-perception since the marriage experience?
2. Have you ever felt that your background makes you seem less valued or capable than others?
3. When someone discusses marriage, relationships, or personal accomplishments, how does it make you feel?
4. Could you describe any instances in which you felt denigrated or judged by others?

## **SECTION C: SOCIAL EXPERIENCES**

### **Social Stigma**

1. How is your early marriage experience perceived or discussed within your community?
2. Have you ever experienced discrimination, judgment, or disdain because you were a child bride?
3. Could you provide examples of instances when you felt ashamed or excluded in social situations?
4. What impact do the views of the society regarding child marriage have on your involvement in social or community events?

### **Financial Dependence**

1. Can you explain how your early marriage affected your ability to earn a living?
2. How does it feel to be financially dependent on someone you now rely on?
3. What impact do financial difficulties have on your relationships with family, friends, and neighbors?
4. Have you ever had trouble getting the food or medical services you need?

## **SECTION D: COPING STRATEGIES**

### **Seeking Help from Others**

1. Who do you typically turn to for support or assistance when you're having emotional or social problems?
2. Could you explain the ways in which your friends, family, and neighbors have helped you since your marriage?
3. In your opinion, does social support play a role in helping you deal with the difficulties that followed your early marriage?

### **Engaging in Religious and Spiritual Practices**

1. Do you engage in any spiritual or religious pursuits to assist you in dealing with your circumstances? Which ones, if any?
2. In what ways do worship, prayer, or faith aid in your emotional control or sense of calm?
3. How do you view the past and the future in light of your religious beliefs?

### **Coping Appraisal**

1. What do you often think about or do when you encounter challenges relating to your previous marriage?
2. How certain are you that you can manage issues in the future?
3. Could you elaborate on any personal assets or abilities that have enabled you to manage the fallout from child marriage?
